# Supplementary material for: Classical group theory adapted to the mechanism of Pt3Ni nanoparticle growth: the role of W(CO)6 as the “shape-controlling” agent
Source: Royal Society of Chemistry journal article supplement (doi:10.1039/c5cp05060j), 2015-11-16
Supplement: c5cp05060j1.pdf [file c5cp05060j1.pdf]

## Supporting information

### Classical Group Theory adapted to the mechanism of Pt<sub>3</sub>Ni nanoparticle growth: the role W(CO)<sub>6</sub> as the “shape-controlling” agent

M. Radtke and A. Ignaszak\*

\* [anna.ignaszak@uni-jena.de](mailto:anna.ignaszak@uni-jena.de)

## Materials

Oleylamine technical grade 70 %, oleic acid (analytical standard), platinum acetylacetonate (97 %), nickel acetylacetonate (95%), tungsten hexacarbonyl (99.9 %), chloroform of purity ≥99 % were purchased from Sigma-Aldrich.

### Synthesis of cuboctahedral Pt<sub>3</sub>Ni nanoparticles:

Three-neck 25 mL round bottom flask was first charged with 10 mL of (9Z)-Octadecene and cis- $\Delta$ 9-Octadecenoic acid (1 mL). Subsequently, under counter flow of dry nitrogen 20 mg (0.05 mmol) of Pt(acac)<sub>2</sub>, 10 mg (0.04 mmol) of Ni(acac)<sub>2</sub> were added to the solvent and the reaction flask was heated up to 130°C. The solution was vigorously stirred for 5 minutes and then tungsten hexacarbonyl (50 mg, 1.7 mL CHCl<sub>3</sub>) was introduced and the temperature was increased in small intervals up to 200 °C over 30 minutes. The reaction was carried out for 30 minutes leading to brown colloidal product.

### Synthesis of Pt<sub>3</sub>Ni polypods:

Three-neck 25 mL round bottom flask was first charged with 10 mL of (9Z)-Octadecene and cis- $\Delta$ 9-Octadecenoic acid (1 mL). Subsequently, under counter flow of dry nitrogen 20 mg (0.05 mmol) of Pt(acac)<sub>2</sub>, 10 mg (0.04 mmol) of Ni(acac)<sub>2</sub> were added to the solvent and the reaction flask was heated up to 130°C. The solution was vigorously stirred for 5 minutes and then tungsten hexacarbonyl (50 mg, 1.7 mL CHCl<sub>3</sub>) was added and the temperature was increased in small intervals up to 230 °C over 45 minutes, and then kept at this temperature for 240 minutes leading to black colloidal product.

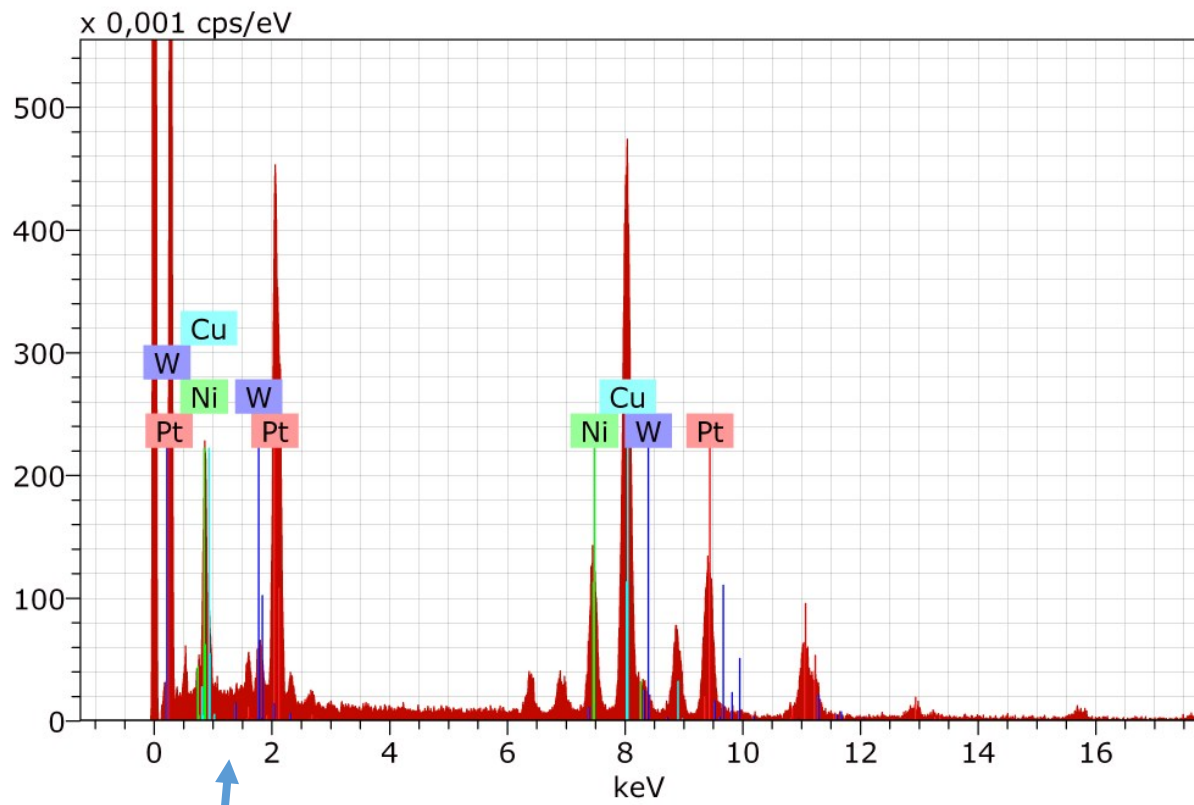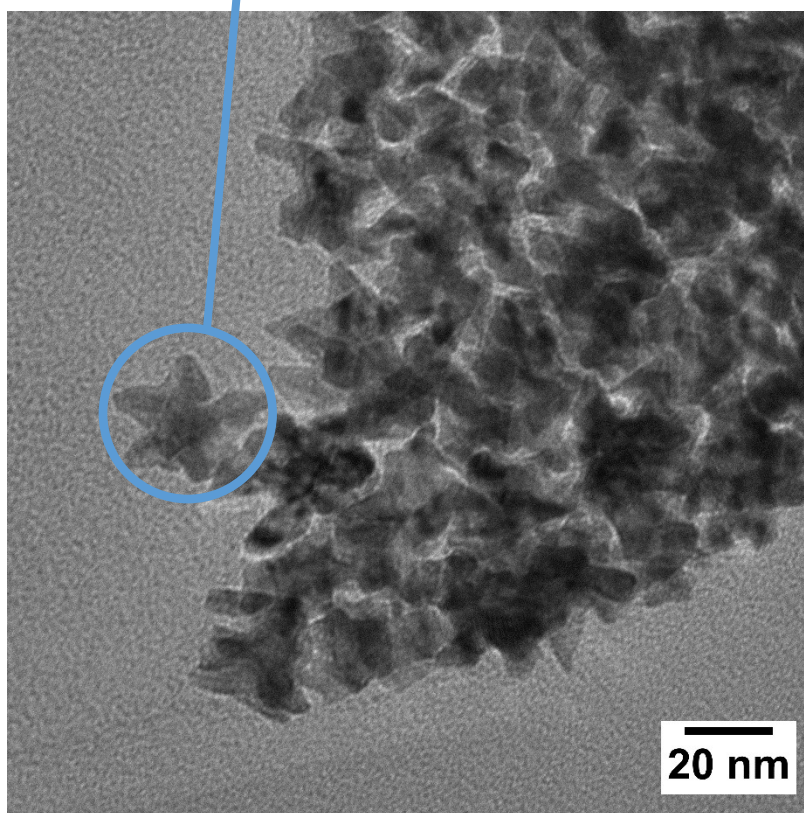

Fig. S1 HR-TEM and spot-resolved EDX elemental mapping of Pt<sub>3</sub>Ni nanoparticles.
